# Supplementary material for: Heterologous SARS-CoV-2 IgA neutralising antibody responses in convalescent plasma
Source: medRxiv preprint, doi:10.1101/2022.02.06.22270359, version 1 (2022-02-08)
Supplement: Supp materials [file 270359_file04.pdf]

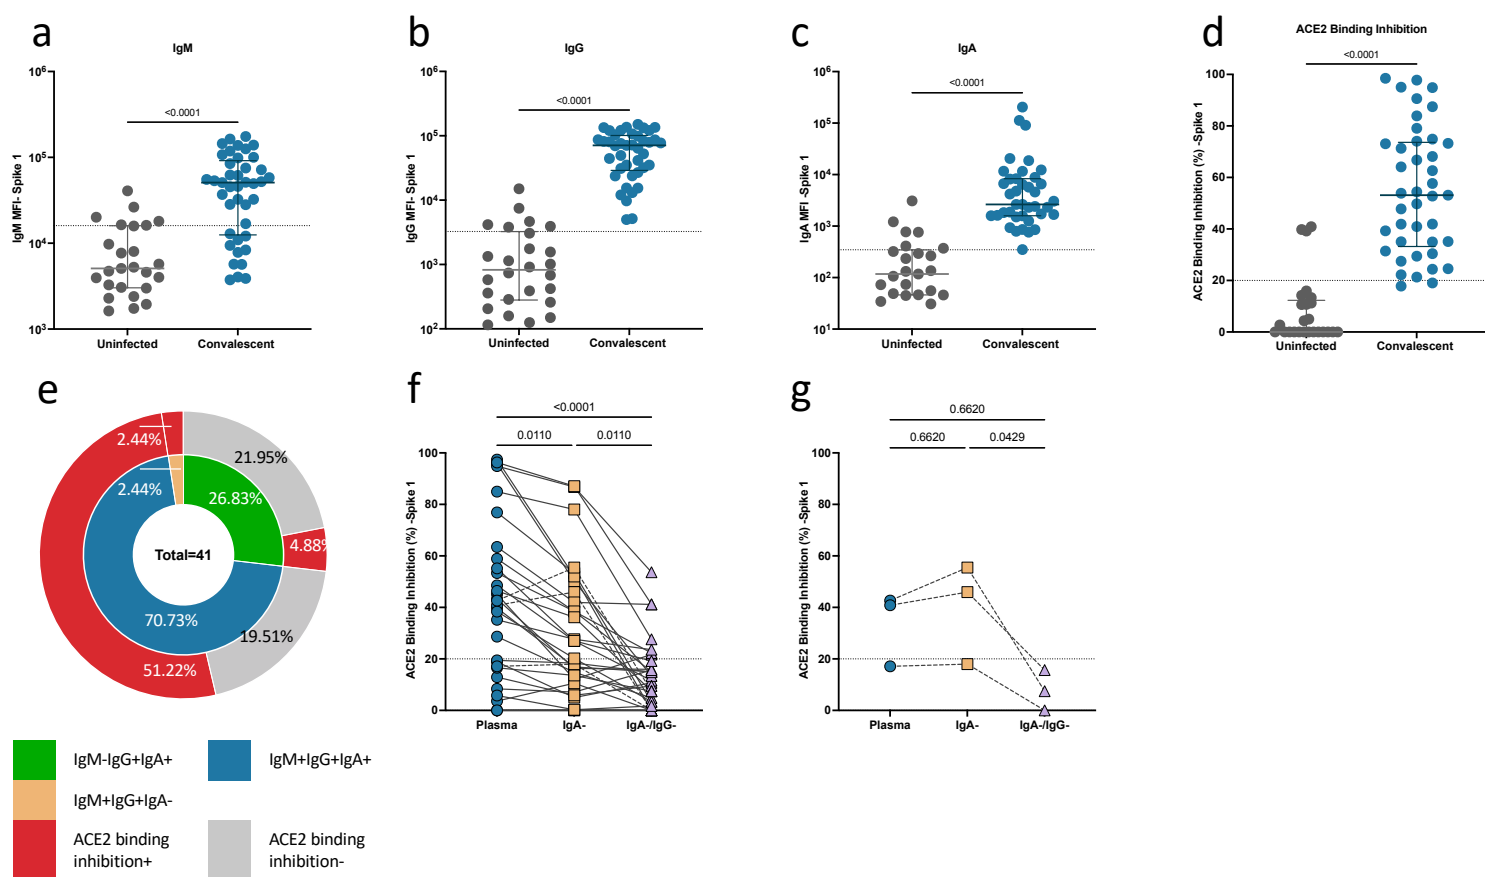

### Supplementary Figure 1. Anti-spike 1 plasma, IgA depleted plasma, IgA and IgG depleted plasma and purified IgG and IgA antibody isotype and ACE2 binding inhibition data

Convalescent (n=41) (blue) and uninfected control (n=26) (grey) plasma (final dilution 1:100) was assessed for IgM (a), IgG (b) and IgA (c) antibody binding to SARS-CoV-2 spike-1 (S1) via multiplex. A positive threshold (grey dotted line) was defined as the 75<sup>th</sup> percentile of antibody binding (MFI) for uninfected control plasma to respective antigens. (d) S1-ACE2 binding inhibition (%) of convalescent (blue) and uninfected control (grey) plasma (diluted 1:100). Statistical analyses between two groups were performed with the Mann-Whitney test. A positive threshold (grey dotted line) was defined as >20% ACE2 binding inhibition. (e) Pie chart outlining the percentage of subjects seropositive for anti-S1 antibody isotypes (IgM-IgG+IgA+ (green), IgM+IgG+IgA+ (blue), IgM-IgG+IgA- (yellow)) in the inner ring and the percentage of each seropositive subset with ACE2 binding inhibition in the outer red ring. SARS-CoV-2 S1 ACE2 binding inhibition (%) of (f) convalescent plasma (diluted 1:200; blue) and matched dilutions of IgA depleted (IgA-; yellow) and IgA plus IgG depleted (IgA-/IgG-; purple) (n=30) plasma fractions. Comparisons between plasma and depleted fractions was conducted using Friedman with Dunn's multiple comparison test. (sup. Fig. 3 describes inclusion/exclusion criteria for successful antibody depletion). (g) Samples where IgA depletion resulted in an increase in RBDwt ACE2 binding inhibition (n=3).

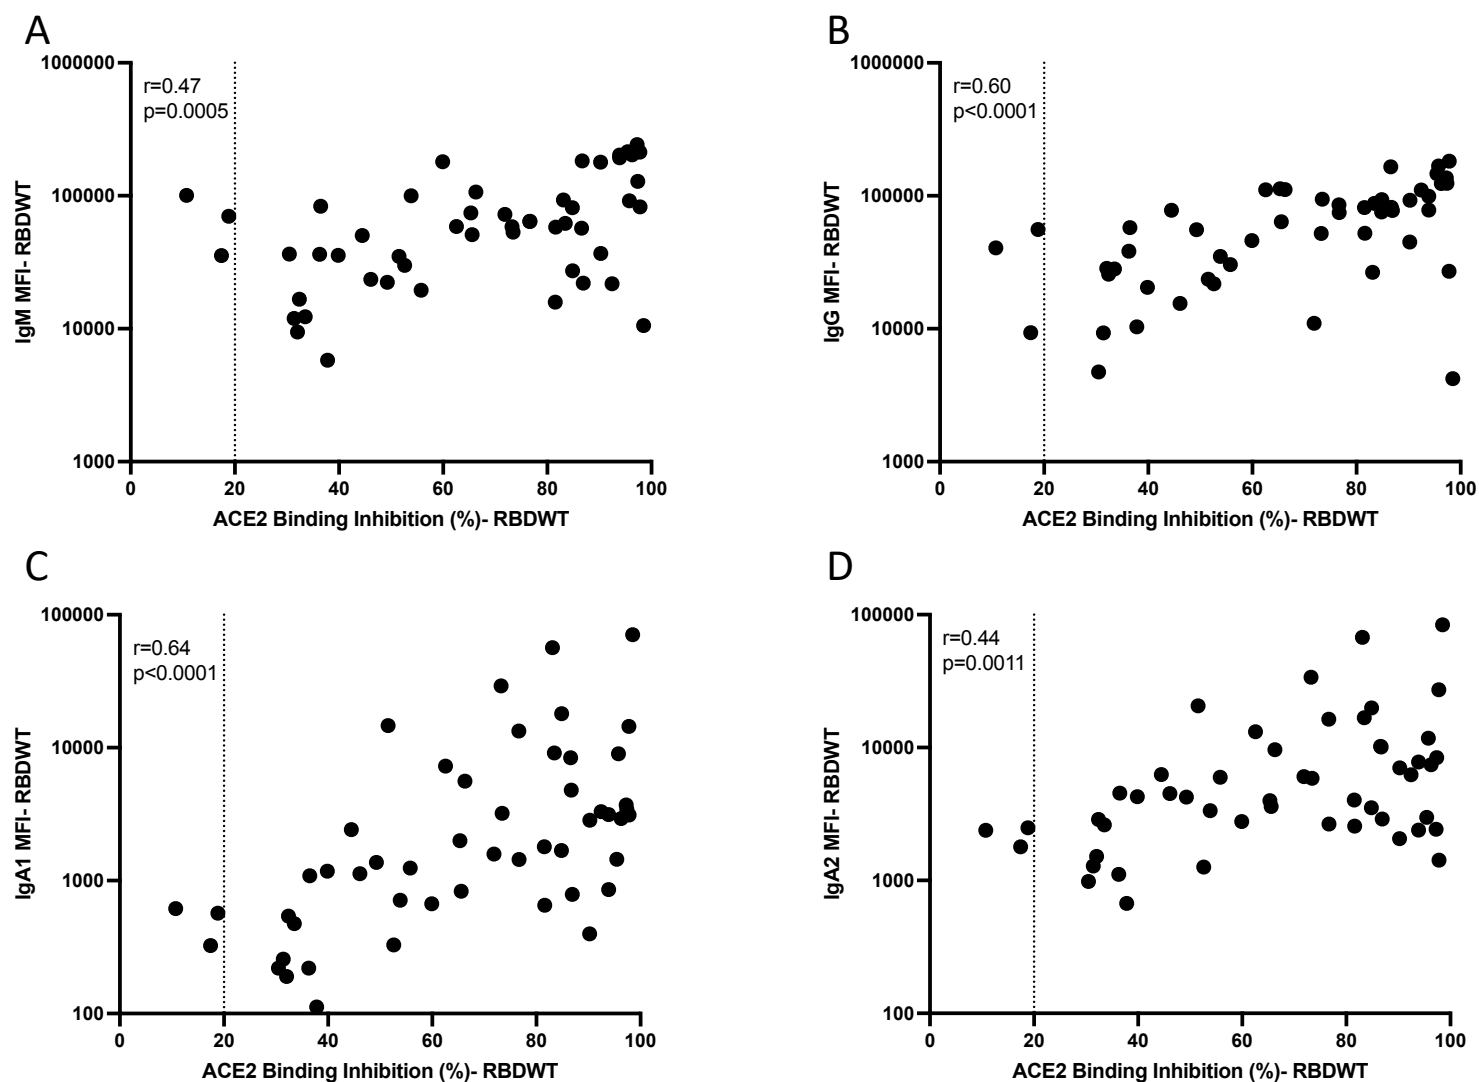

**Supplementary Figure 2. Individual correlations of convalescent RBDWT plasma IgM (a), IgG (b), IgA1 (c) and IgA2 (d) antibody binding with RBDWT-ACE2 binding inhibition**

# Supplementary Figure 3. Workflow of sample processing and confirmation of IgG and IgA depletion

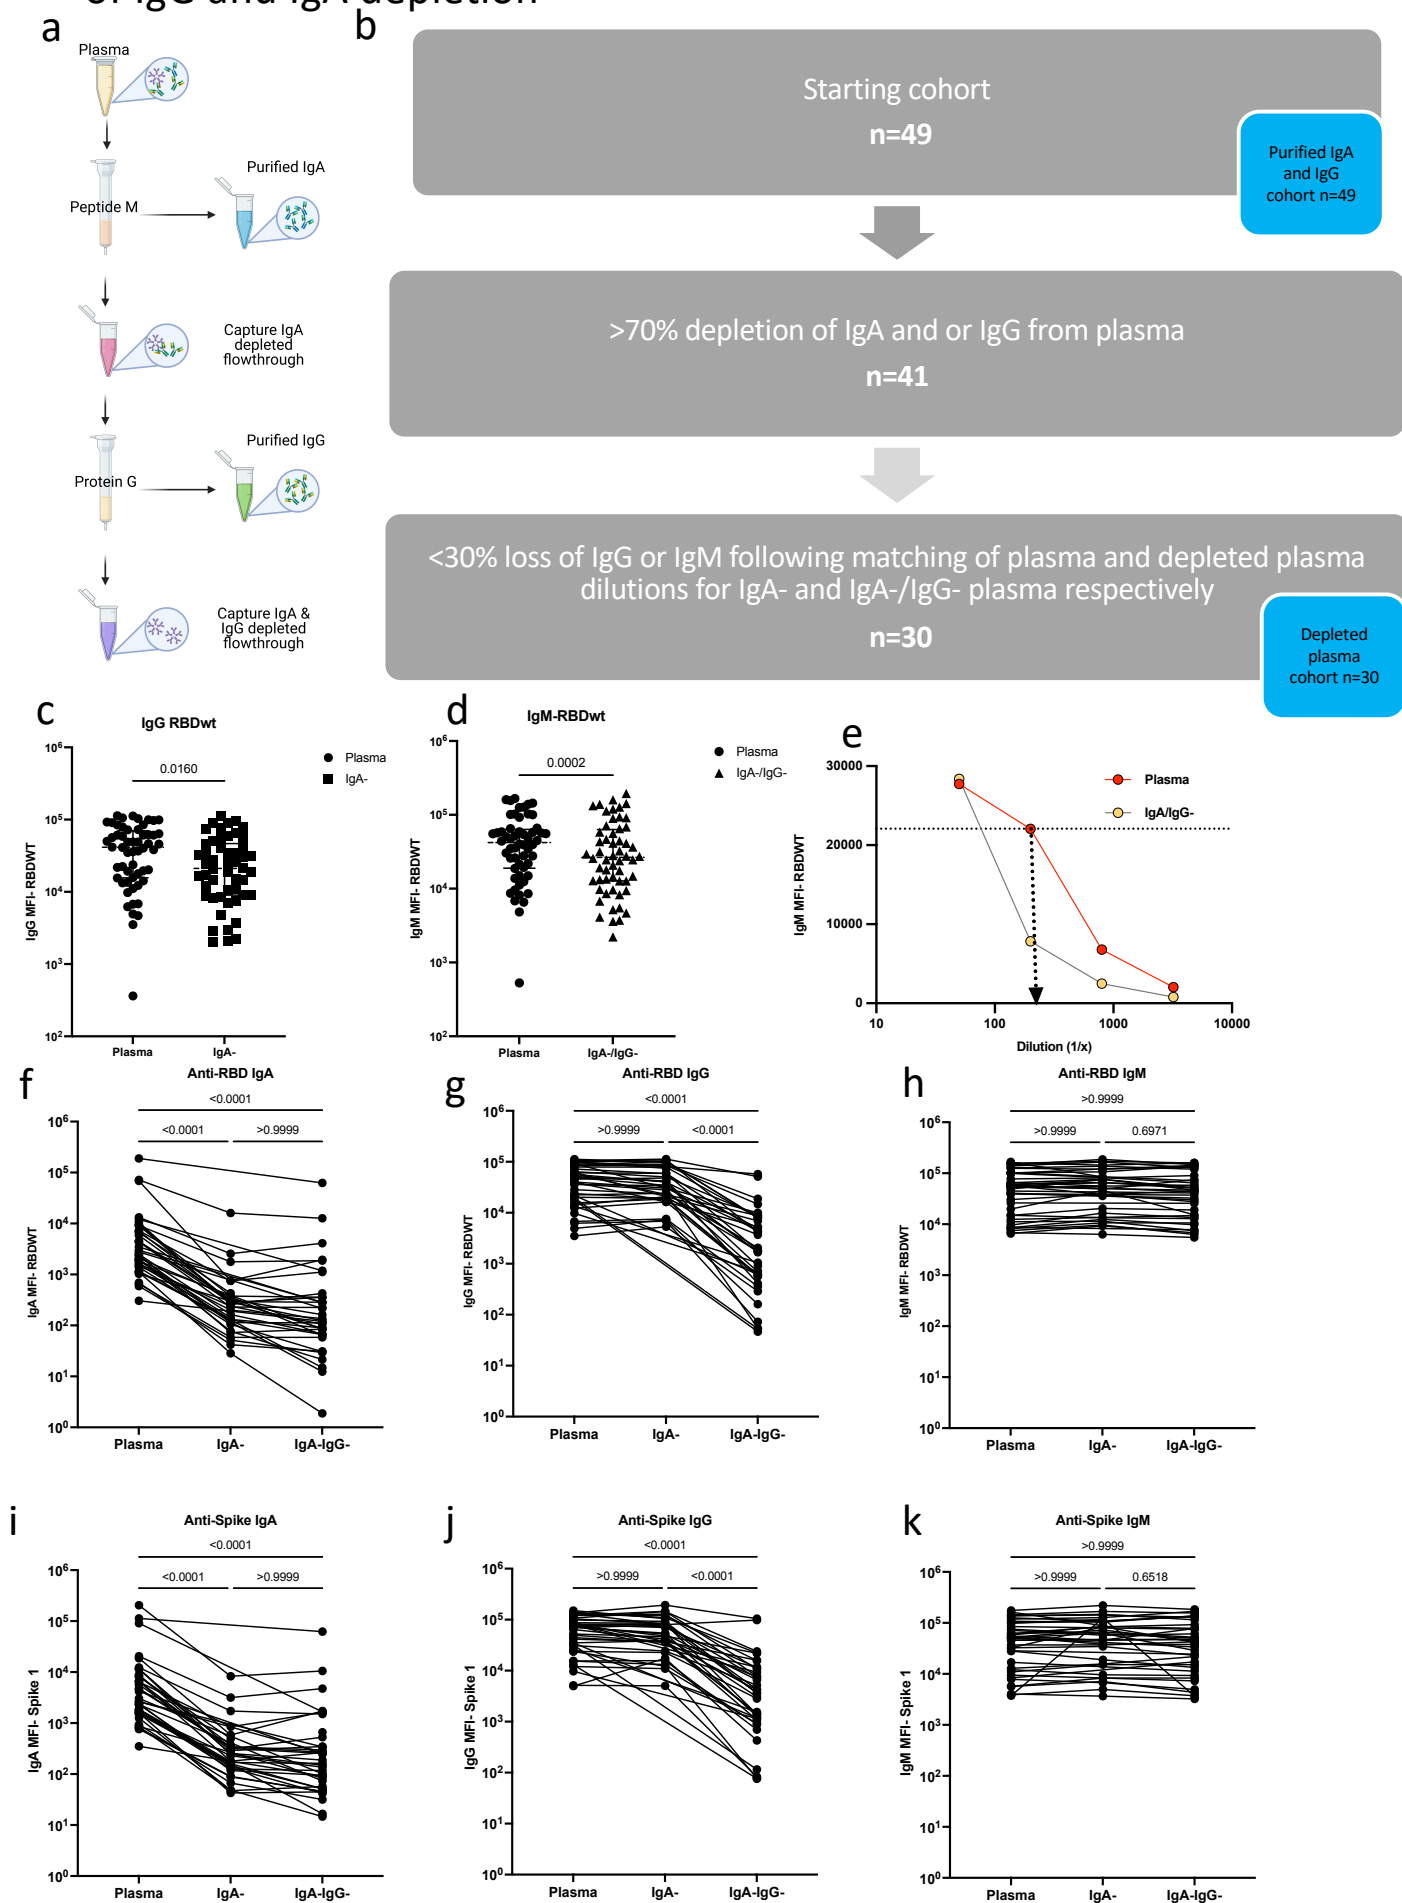

**Supplementary Figure 3. Workflow of sample processing and confirmation of IgG and IgA depletion**

**(a)** Depletion and purification of IgA and IgG from convalescent plasma and **(b)** sample exclusion process. **(c-d)** Significant loss of anti-RBDWT IgG and IgM from IgA- and IgA-/IgG- plasma respectively (1:100 dilution). For fair comparison, depleted plasma dilutions were matched to complete plasma (1:100 dilution). Using anti RBDWT IgG or IgM binding MFI of IgA- and IgA-/IgG- plasma respectively **(e)**, a plasma dilution was selected to match the antibody MFI for complete plasma (yellow) at 1:100 dilution. Matching is indicated by the black dotted arrow. Anti-RBDWT IgA **(f)**, IgG **(g)** and IgM **(h)** MFI for plasma, IgA- and IgA and IgA-/IgG- for matched dilutions. Anti-Spike 1 IgA **(i)**, IgG **(j)** and IgM **(k)** MFI for plasma, IgA- and IgA and IgA-/IgG- for matched dilutions.

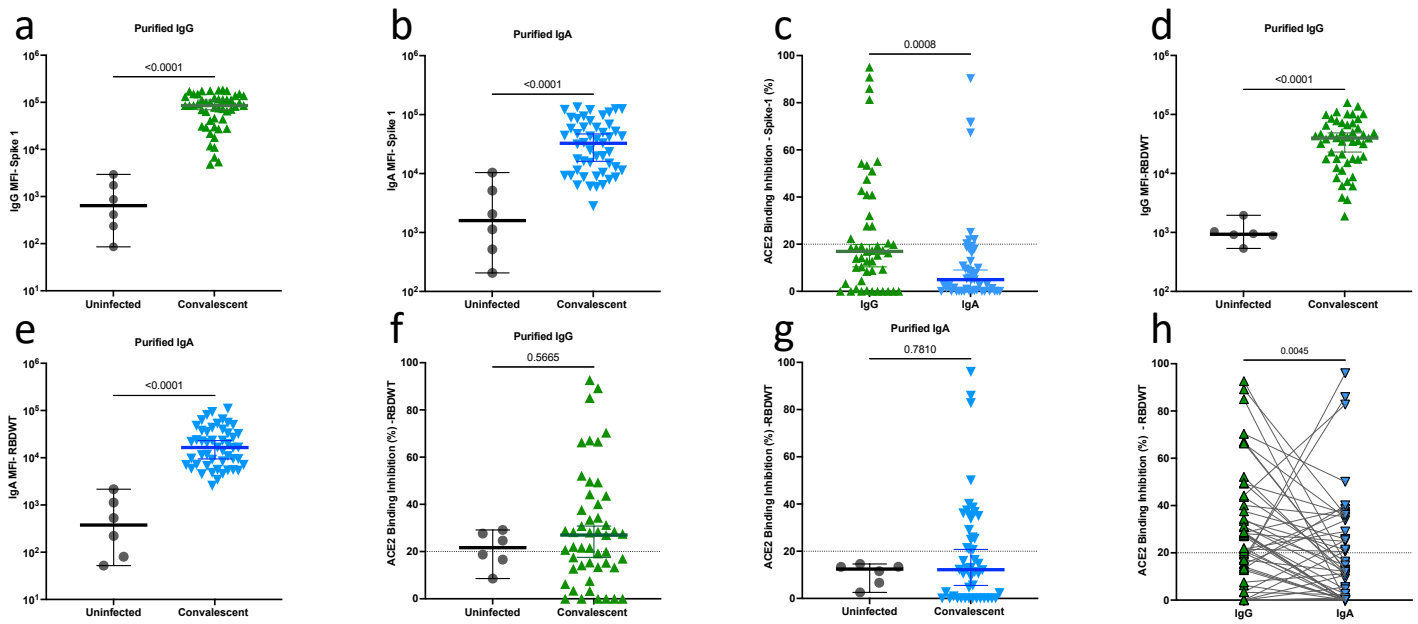

**Supplementary Figure 4. Purified convalescent IgG and IgA spike 1 and RBDWT supplementary data**  
Purified IgA (a) (blue) and IgG (b) (green) anti-S1 antibody binding (MFI) for uninfected (n=6, grey) and convalescent (n=49) cohorts at 100ug/ml total antibody. (c) Purified IgA (blue) and IgG (green) S1-ACE2 binding inhibition (%) at 100ug/ml total antibody (n=49). Purified IgA (d) (blue) and IgG (e) (green) anti-RBDWT antibody binding (MFI) for uninfected (n=6, grey) and convalescent (n=49) subjects at 100ug/ml total antibody. Purified IgA (f) (blue) and IgG (g) (green) anti-RBDWT RBDWT-ACE2 binding inhibition for uninfected (n=6, grey) and convalescent (n=49) cohorts at 100ug/ml total antibody. (h) Purified IgA (blue) and IgG (green) RBDWT-ACE2 binding inhibition (%) at 100ug/ml total antibody (n=49). Lines connect IgG and IgA for a single individual. A positive threshold of 20% ACE2 binding inhibition was set (grey dotted line).

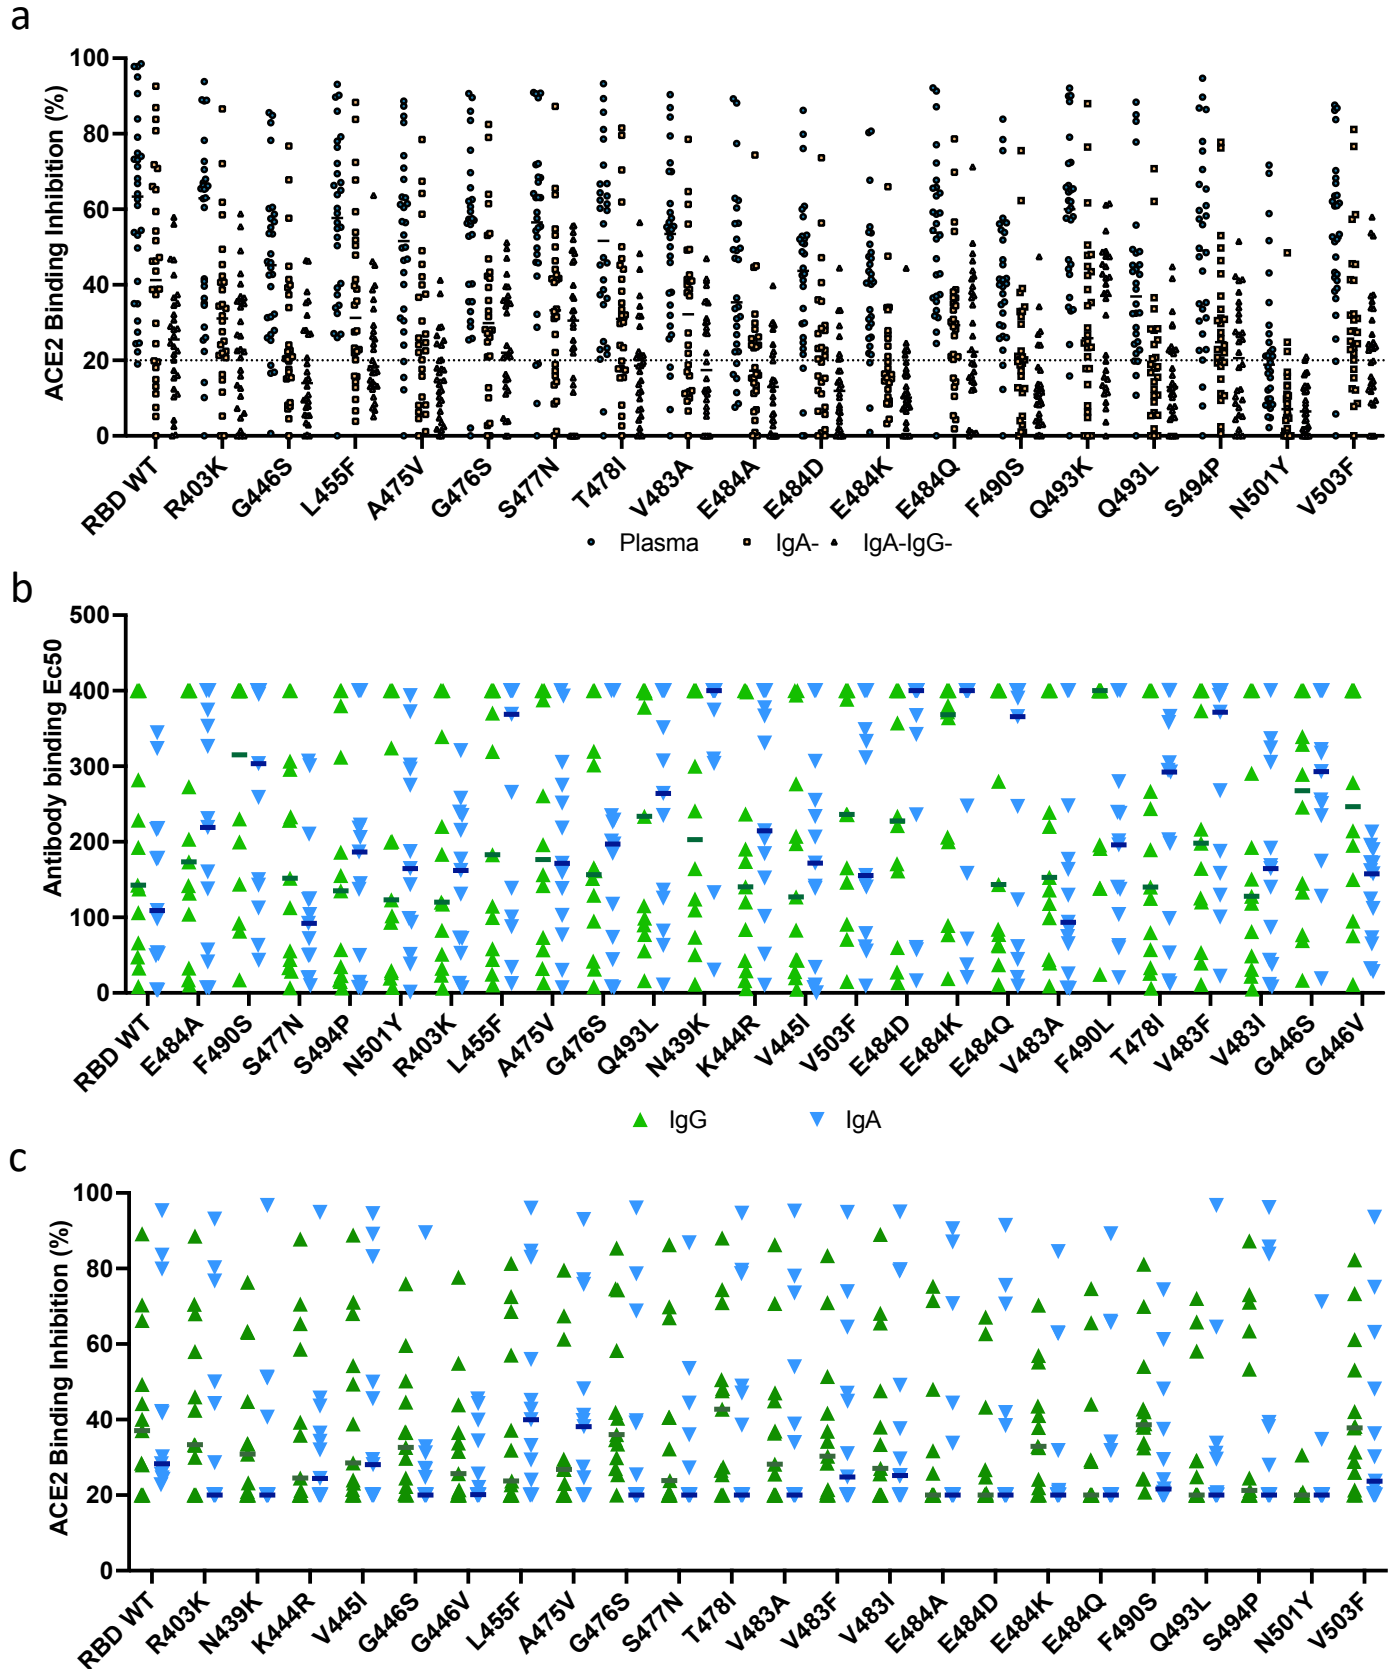

**Supplementary Figure 5. Raw ACE2 binding inhibition and antibody binding data for depleted plasma and purified antibodies to single RBD mutations.**

(a) ACE2 binding inhibition (%) to RBDWT and 18 other RBD single mutants for plasma (blue), IgA depleted (IgA-, yellow) plasma and IgA and IgG depleted (IgA-IgG-, purple triangle) plasma. Raw purified IgG (green) and IgA (blue) Ec50's (b) and ACE2 binding inhibition (%) (c) for RBDWT and 23 other RBD single mutants. Lines depict the median response for each sample type to each RBD.

a

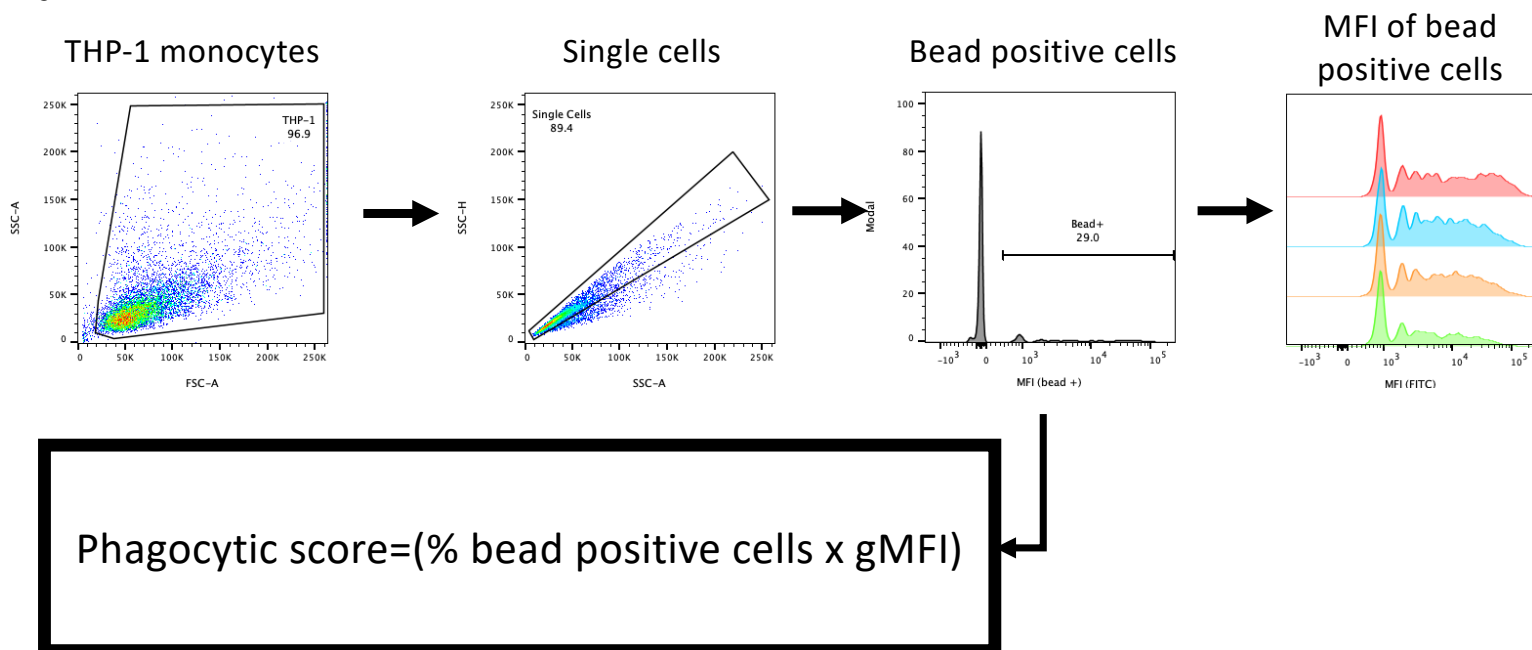

b

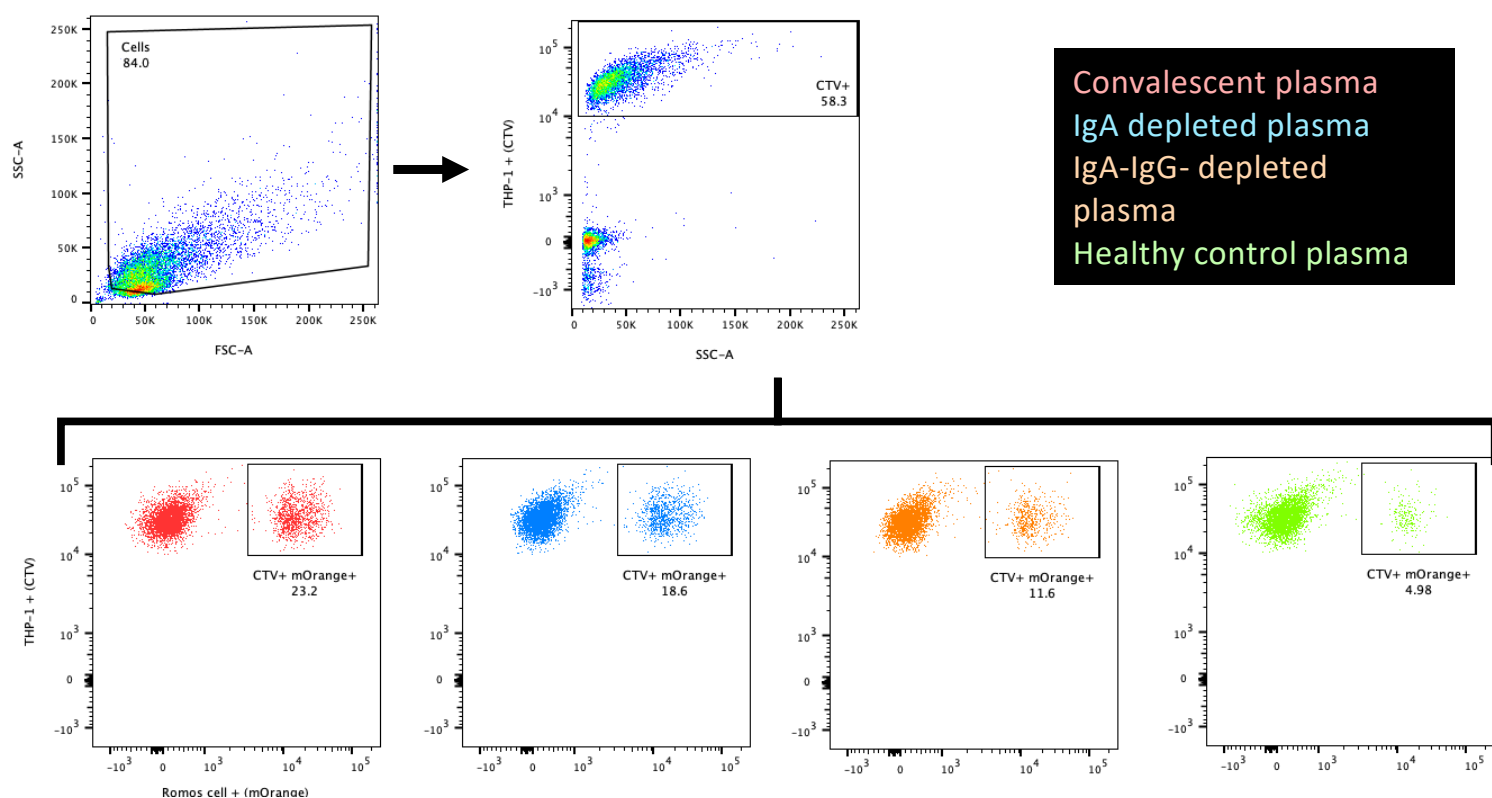

**Supplementary Figure 6. Gating strategy of ADCP bead-based assay and THP-1 Ramos S-orange association assay.**

**(a)** Antibody dependent bead-based phagocytosis assay gating strategy. First, THP-1 monocytes were gated, followed by single cells and bead positive cells. Finally, a phagocytic score was calculated. **(b)** THP-1 and Ramos S-orange cell association assay gating strategy. Cells were gated, followed by cell trace violet (CTV) stained THP-1 monocytes. Finally, CTV+ (THP-1) mOrange+ (Ramos S-orange) cells were gated for and the percentage of double positives was recorded as a measure of anti-spike antibody mediated cell association. Example convalescent plasma (red), IgA- plasma (blue), IgA-IgG- plasma (orange) and healthy control plasma (green) are shown.

**Supplementary table S1: Subject demographics**

|                                             |                | Healthy controls |                    | COVID-19 Convalescent |                    |
|---------------------------------------------|----------------|------------------|--------------------|-----------------------|--------------------|
|                                             |                | Multiplex (n=26) | Functional (n=12)* | Multiplex (n=41)      | Functional (n=39)* |
| Sample collection data (month)              |                | April-May 2020   | April-May 2020     | April-May 2020        | April-May 2020     |
| Date of PCR test (month)                    |                |                  |                    | March 2020            | March 2020         |
| Age, Median (IQR)                           |                | 54 (24-60)       | 55 (24-63)         | 55 (49-61)            | 57 (52-69)         |
| Gender, female (%)                          |                | 12 (48)          | 5 (45.45)          | 11 (26.83)            | 11 (28.21)         |
| PCR and/or serology                         |                | Negative**       | Negative**         | Positive              | Positive           |
| Disease Severity (self-report)              | Mild (%)       | -                | -                  | 27 (65.85)            | 26 (68.42)         |
|                                             | Moderate (%)   | -                | -                  | 7 (17.07)             | 6 (15.79)          |
|                                             | Sever (%)      | -                | -                  | 2 (4.88)              | 1 (2.63)           |
|                                             | No details (%) | -                | -                  | 5 (12.20)             | 5 (13.16)          |
| Days post positive COVID test, median (IQR) |                | -                | -                  | 36 (30-44)            | 36 (30-38)         |
| Days post symptom onset, median (IQR)       |                | -                | -                  | 41 (36-47)            | 40 (38-42)         |

- Not applicable

\*Individuals were randomly selected from original cohort

\*\*Confirmed negative using serology

**Supplementary Table 2. Matched depleted plasma dilution to completes plasma at 1:100**

|    | Subject ID | Dilution IgA- (1/n) | Dilution IgA-/IgG- (1/n) |
|----|------------|---------------------|--------------------------|
| 1  | CP07       | 100                 | 100                      |
| 2  | CP11       | 50                  | 50                       |
| 3  | CP15       | 50                  | 50                       |
| 4  | CP19       | 100                 | 100                      |
| 5  | CP23       | 100                 | 100                      |
| 6  | CP25       | 100                 | 100                      |
| 7  | CP26       | 100                 | 100                      |
| 8  | CP27       | 50                  | 50                       |
| 9  | CP29       | 100                 | 100                      |
| 10 | CP30       | 100                 | 50                       |
| 11 | CP31       | 50                  | 50                       |
| 12 | CP32       | 50                  | 100                      |
| 13 | CP35       | 100                 | 50                       |
| 14 | CP39       | 100                 | 100                      |
| 15 | CP43       | 100                 | 100                      |
| 16 | CP44       | 100                 | 100                      |
| 17 | CP45       | 100                 | 100                      |
| 18 | CP46       | 100                 | 100                      |
| 19 | CP51       | 100                 | 100                      |
| 20 | CP52       | 50                  | 50                       |
| 21 | CP53       | 50                  | 50                       |
| 22 | CP54       | 50                  | 100                      |
| 23 | CP57       | 100                 | 100                      |
| 24 | CP58       | 50                  | 100                      |
| 25 | CP60       | 100                 | 100                      |
| 26 | CP61       | 100                 | 100                      |
| 27 | CP63       | 100                 | 100                      |
| 28 | CP66       | 50                  | 50                       |
| 29 | CP68       | 50                  | 100                      |
| 30 | CP70       | 50                  | 50                       |
